# Supplementary material for: Self-assembling manifolds in single-cell RNA sequencing data
Source: eLife journal article supplement (doi:10.7554/elife.48994), 2019-09-16
Supplement: supp [file elife-48994-supp-v1.zip]

Full dataset

cl

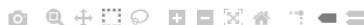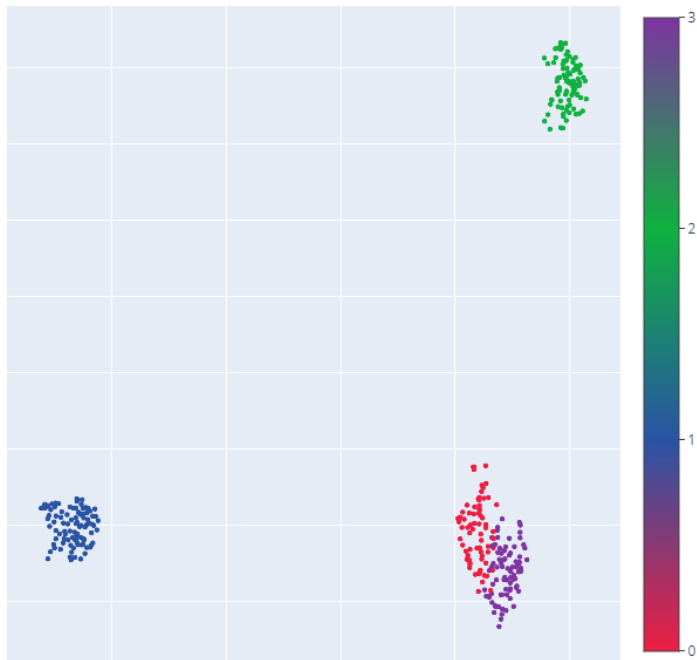

Interact

Run

Preprocess

Output

Compute projection

UMAP

Display projection

X\_umap

Cluster

Leiden cluster

Leiden 'res'

1.000000

Disp obs ann

cl

Disp var ann

Find markers (RF)

Find markers (S...

☒ Avg expr

Unselect all (x)

Select all (c)

Reset view (v)

Annotate

Get similar genes

Show expressions

Ranked genes

0

Threshold expr

0.00

Save

Opacity

0.100000

Marker size

5.000000

Close current tab

ReadMe

Interact

Run

Preprocess

Output

Run SAM

Set defaults

# neighbors:

20

num\_norm\_avg:

50

Preprocessing:

Normalizer

Distance:

correlation

Projection:

umap

Interact

Run

Preprocess

Output

Process data

Set defaults

☒ Filter genes

Data normalization:

log

Library normalization:

None

Expr threshold:

0.010000

Min expr:

1.000000

Load data

Load annotations

Load gene annotati...

Interact

Run

Preprocess

Output

```
RUNNING SAM
Iteration: 0, convergence: 0.45683951491902614
Iteration: 1, convergence: 0.128590838378545
Iteration: 2, convergence: 0.07346582005464121
Iteration: 3, convergence: 0.02199915185950003
Iteration: 4, convergence: 0.008469597405567731
computing the UMAP embedding...
Elapsed time: 2.4737389087677 seconds
```
