# Supplementary material for: Self-assembling manifolds in single-cell RNA sequencing data
Source: eLife. 2019 Sep 16;8:e48994. doi: 10.7554/eLife.48994 (PMC6795480; doi:10.7554/eLife.48994)
Supplement: Supplementary file 3. — The ARI scores of SAM, Seurat, SC3, and SIMLR applied to the nine benchmarking datasets are provided for each annotated ground truth cluster. [file elife-48994-supp3.xlsx]

## Sheet: Tarashansky et al. SI_table 3
ARI of individual cell types for nine benchmarking datasets, with each dataset listed in a separate sheet

## Sheet: Darmanis
Darmanis labels	# cells	SAM	SC3	SIMLR	Seurat	Seurat optimized	Ground truth
OPC	18	0.00488784	0.00601471	0.00524587	0.00197135	0.0012902	0.00856327
astrocytes	62	0.110213	0.106149	0.0436941	0.106592	0.0972831	0.105838
endothelial	20	0.00625281	0.0129979	0.00548712	0.00399869	0.00361796	0.0106341
fetal_quiescent	110	0.245863	0.29683	0.205549	0.351902	0.314196	0.335535
fetal_replicating	25	0.012592	0.013845	0.010286	0.00720371	0.00623177	0.0167907
microglia	16	0.00490726	0.00590369	0.00411441	0.0050205	0.00541104	0.00671629
neurons	131	0.477713	0.239546	0.264483	0.133733	0.341031	0.476577
oligodendrocytes	38	0.0357201	0.0422888	0.0241036	0.0385918	0.0351849	0.0393463
Total	420	0.898149	0.723575	0.562963	0.649013	0.804246	1

## Sheet: Wang
Wang labels	# cells	SAM	SC3	SIMLR	Seurat	Seurat optimized	Ground truth
acinar	6	0.000519252	4.77056e-05	0.000341484	-5.98333e-05	0.000108108	0.000514139
alpha	190	0.550828	0.346783	0.22177	0.283977	0.469823	0.615424
beta	111	0.195844	0.229122	0.210111	0.099254	0.137503	0.209254
delta	9	0.000528997	0.00075719	0.00143096	0.000682481	0.000222593	0.00123393
duct	96	0.144513	0.142161	0.16704	0.0557373	0.127981	0.156298
mesenchyme	27	0.00612595	0.00792682	0.0139519	0.00183539	0.00535003	0.0120308
pp	18	0.00529637	0.00630196	0.00241319	0.000758853	0.00338844	0.00524422
Total	457	0.903655	0.7331	0.617058	0.442185	0.744376	1

## Sheet: Baron1
Baron1 labels	# cells	SAM	SC3	SIMLR	Seurat	Seurat optimized	Ground truth
acinar	110	0.0124965	0.0204344	0.0148908	0.0124284	0.0124466	0.013036
activated_stellate	51	0.00264597	0.00396121	0.00115846	0.00277566	0.00277963	0.00277246
alpha	236	0.0586616	0.0359912	0.0259303	0.0583442	0.0584289	0.0602982
beta	872	0.801176	0.160387	0.399403	0.806735	0.805421	0.82577
delta	214	0.0376969	0.064373	0.0385182	0.0459834	0.0442919	0.0495585
ductal	120	0.0149446	0.0135993	0.0173672	0.00727001	0.0148851	0.0155258
endothelial	130	0.0179788	0.0250067	0.0115574	0.0178822	0.017908	0.018233
epsilon	13	0.000107119	0.00015475	0.000125763	0.000106383	7.77304e-05	0.000169609
gamma	70	0.00508609	0.00804521	0.00517354	0.00525743	0.00526494	0.00525136
macrophage	14	0.000199166	0.000273173	0.000226033	0.000198106	0.000198389	0.000197877
mast	8	6.12818e-05	9.92803e-05	6.95485e-05	6.09557e-05	6.10428e-05	6.08853e-05
quiescent_stellate	92	0.00838403	0.0128324	0.00739714	0.00885054	0.00834985	0.00910235
schwann	5	4.54227e-06	3.54572e-05	2.48388e-05	2.17699e-05	2.1801e-05	2.17448e-05
t_cell	2	2.18863e-06	3.54572e-06	2.48388e-06	2.17699e-06	2.1801e-06	2.17448e-06
Total	1937	0.959445	0.345197	0.521845	0.965916	0.970137	1

## Sheet: Baron2
Baron2 labels	# cells	SAM	SC3	SIMLR	Seurat	Seurat optimized	Ground truth
acinar	3	8.49683e-06	1.3339e-05	1.10665e-05	8.46509e-06	8.45637e-06	8.39734e-06
activated_stellate	81	0.00917658	0.0132659	0.0112691	0.00884621	0.00883696	0.00906913
alpha	676	0.601988	0.175123	0.305347	0.599635	0.601418	0.638618
beta	371	0.191653	0.0923138	0.0994385	0.190932	0.190734	0.192117
delta	125	0.0219501	0.0332708	0.0236122	0.0214092	0.0213869	0.0216931
ductal	301	0.127877	0.0609444	0.166551	0.1274	0.127268	0.12638
endothelial	23	0.000716566	0.00112492	0.000933275	0.000713889	0.000713154	0.000708176
epsilon	2	-8.76044e-07	4.44634e-06	-6.04751e-07	2.8217e-06	2.81879e-06	2.79911e-06
gamma	86	0.010352	0.0162514	0.0134827	0.0103133	0.0103027	0.0102308
macrophage	17	0.00038519	0.000604702	0.000432984	0.000383751	0.000383356	0.000380679
mast	9	0.000101962	0.000160068	0.000132798	7.19724e-05	0.000101476	0.000100768
quiescent_stellate	22	0.000576381	0.000584476	0.000676084	0.000651812	0.000651141	0.000646595
schwann	6	4.24842e-05	6.66951e-05	5.53325e-05	4.23255e-05	4.22819e-05	4.19867e-05
t_cell	2	2.83228e-06	4.44634e-06	3.68884e-06	2.8217e-06	2.81879e-06	2.79911e-06
Total	1724	0.96483	0.393733	0.621945	0.960413	0.961853	1

## Sheet: Baron3
Baron3 labels	# cells	SAM	SC3	SIMLR	Seurat	Seurat optimized	Ground truth
acinar	843	0.246879	0.112986	0.218936	0.242105	0.242128	0.254088
activated_stellate	100	0.0032945	0.00564538	0.00299971	0.00356761	0.00331208	0.00354389
alpha	1130	0.438423	0.0473949	0.18375	0.43828	0.44072	0.456686
beta	787	0.209066	0.0698798	0.170906	0.211553	0.212242	0.221433
delta	161	0.00868684	0.0125809	0.00788772	0.00775501	0.00831376	0.00922127
ductal	376	0.0496867	0.0268843	0.038472	0.0497843	0.0499442	0.0504736
endothelial	92	0.0021743	0.00399468	0.00238195	0.00247224	0.00262761	0.00299691
epsilon	2	7.19317e-07	-5.91415e-08	-2.21586e-07	-1.94787e-07	7.23026e-07	7.15937e-07
gamma	36	0.000390984	0.000678071	0.000362865	0.000422017	0.000335355	0.000451041
macrophage	14	6.54578e-05	0.000110652	5.66831e-05	6.55864e-05	6.57953e-05	6.51503e-05
mast	7	1.51057e-05	2.55351e-05	1.30807e-05	1.51353e-05	1.51835e-05	1.50347e-05
quiescent_stellate	54	0.000980874	0.00118664	0.000803532	0.000982842	0.000938345	0.00102451
schwann	1	0	0	0	0	0	0
t_cell	2	7.19317e-07	1.21596e-06	6.22891e-07	7.2073e-07	7.23026e-07	7.15937e-07
Total	3605	0.959664	0.281368	0.626571	0.957004	0.960644	1

## Sheet: Baron4
Baron4 labels	# cells	SAM	SC3	SIMLR	Seurat	Seurat optimized	Ground truth
acinar	2	5.05247e-06	-6.39391e-07	5.93628e-06	5.02664e-06	5.03423e-06	4.76379e-06
activated_stellate	52	0.00669957	0.0100554	0.00787151	0.00666533	0.00667539	0.00631678
alpha	284	0.203039	0.106632	0.0990353	0.202001	0.202306	0.191438
beta	495	0.589015	0.145505	0.313068	0.592245	0.59632	0.582444
delta	101	0.0235838	0.0374732	0.0178788	0.0247339	0.0247717	0.0240571
ductal	280	0.0937531	0.0816237	0.140229	0.0946332	0.094036	0.186074
endothelial	7	0.000106102	0.000159248	0.000124662	0.000105559	6.66476e-05	0.00010004
epsilon	1	0	0	0	0	0	0
gamma	63	0.00986747	0.0148101	0.00517377	0.00981703	0.00983185	0.00930368
macrophage	10	0.000227361	0.000341246	0.000267133	0.000226199	0.00022654	0.00021437
mast	1	0	0	0	0	0	0
quiescent_stellate	5	5.05247e-05	7.58325e-05	5.93628e-05	5.02664e-05	5.03423e-05	4.76379e-05
schwann	1	0	0	0	0	0	0
t_cell	1	0	0	0	0	0	0
Total	1303	0.926346	0.396676	0.583714	0.930482	0.934289	1

## Sheet: Koh
Koh labels	# cells	SAM	SC3	SIMLR	Seurat	Seurat optimized	Ground truth
H7_derived_APS	64	0.0894163	0.0785665	0.0814009	0.0237799	0.069107	0.0933939
H7_derived_D2LtM	55	0.0631733	0.0554389	0.0574593	0.0423643	0.0634564	0.0687946
H7_derived_D3GARPpCrdcM	52	0.0588125	0.0516762	0.0535404	0.0395324	0.0565229	0.0614287
H7_derived_D5CntrlDrmmtm	67	0.0980652	0.086166	0.0892745	0.00776775	0.0951997	0.102427
H7_derived_DLL1pPXM	75	0.12308	0.108146	0.112047	0.0812295	0.116275	0.128556
H7_derived_ESMT	45	0.0439098	0.0385818	0.0399736	0.0108103	0.0419041	0.0458631
H7_derived_MPS	60	0.0368383	0.0291371	0.0327472	0.0219754	0.037041	0.0819976
H7_derived_Sclrtm	69	0.0849638	0.0797088	0.0565604	0.0521612	0.0682037	0.108682
H7_dreived_D2.25_Smtmrs	87	0.165926	0.145792	0.143132	0.0898735	0.146156	0.173307
H7hESC	77	0.0789401	0.0680586	0.0605262	0.0502596	0.0793383	0.135551
Total	651	0.843126	0.741272	0.726662	0.419754	0.773204	1

## Sheet: Segerstolpe
Segerstolpe labels	# cells	SAM	SC3	SIMLR	Seurat	Seurat optimized	Ground truth
MHC class II	5	1.85369e-05	1.63921e-05	2.28608e-05	1.89297e-05	1.77795e-05	1.8228e-05
PSC	54	0.00265263	0.00265408	0.00327138	0.00258155	0.00150256	0.00260842
acinar	185	0.0315499	0.048449	0.0384158	0.0309023	0.0294117	0.031024
alpha	886	0.705865	0.101596	0.124561	0.626016	0.640709	0.714637
beta	270	0.00557932	0.016108	0.0102949	0.0613077	0.0645664	0.0661949
co-expression	39	-0.000143266	5.56318e-05	0.000141873	0.000819087	0.000832577	0.00135069
delta	114	0.0116714	0.0120795	0.00659414	0.0106243	0.0111896	0.0117406
ductal	386	0.135916	0.17777	0.0706258	0.137893	0.130327	0.135443
endothelial	16	0.000222443	0.000345616	0.000274329	0.000227157	0.000213355	0.000218736
epsilon	7	2.46848e-05	4.64124e-06	1.85202e-05	3.97524e-05	3.7337e-05	3.82788e-05
gamma	197	0.0357874	0.00859766	0.0127336	0.0346916	0.0343252	0.0351909
mast	7	3.89275e-05	6.04827e-05	4.80077e-05	3.97524e-05	3.7337e-05	3.82788e-05
unclassified	2	1.85369e-06	2.88013e-06	2.28608e-06	1.89297e-06	1.77795e-06	1.8228e-06
unclassified endocrine	41	2.69141e-05	0.00166679	0.000963155	0.000346599	0.000873274	0.00149469
Total	2209	0.929211	0.369407	0.267967	0.90551	0.914045	1

## Sheet: Muraro
Muraro labels	# cells	SAM	SC3	SIMLR	Seurat	Seurat optimized	Ground truth
acinar	219	0.0473337	0.0685835	0.0616228	0.0172949	0.0459772	0.0467956
alpha	812	0.603711	0.177168	0.335246	0.237821	0.59187	0.645478
beta	448	0.176354	0.0999964	0.0912208	0.0681962	0.180854	0.196286
delta	193	0.0342723	0.0413068	0.0422215	0.0139905	0.0340367	0.0363214
ductal	245	0.0410667	0.0627156	0.0565314	0.00879785	0.0413907	0.058595
endothelial	21	0.000370032	0.000551267	0.000488021	0.000125001	0.000372604	0.000411674
epsilon	3	8.89468e-07	8.79531e-06	7.82644e-06	2.2653e-06	6.05835e-06	5.88106e-06
gamma	101	0.00913679	0.0141678	0.0117206	0.00331978	0.00968856	0.00989979
mesenchymal	80	0.00613735	0.00900999	0.00800752	0.00225352	0.00617811	0.00619472
unclear	4	1.20379e-05	7.92989e-06	3.68692e-06	-2.18341e-06	1.21167e-05	1.17621e-05
ARI (Total)	2126	0.918395	0.473516	0.607071	0.351799	0.910386	1
