# Supplementary material for: Self-assembling manifolds in single-cell RNA sequencing data
Source: eLife. 2019 Sep 16;8:e48994. doi: 10.7554/eLife.48994 (PMC6795480; doi:10.7554/eLife.48994)
Supplement: Supplementary file 4. — Functional annotations of the genes were given in the S. mansoni genome version 9 (WormBase, WS268). [file elife-48994-supp4.xlsx]

## Sheet: Tarashansky et al. SI_table 4
Gene ID	Annotation	Cloning primer sequence		Usage
Smp_005350	Calcium-binding protein, putative	CCCTGCCACCACTATCACTT	ATCCTGACCCATCGGTATCA	cloning/FISH
Smp_170340	Putative collagen alpha-1(V) chain	GGTGAAGAAGGCTGTTGTGG	ACGATCCCCTTTCACTCCTG	cloning/FISH
Smp_031770	Tropomyosin-2	AAGCTGAAGTCGCCTCACTA	CATATGCCTCTTCACGCTGG	cloning/FISH
Smp_018250	Putative troponin I	CGTAAACCTGGTCAGAAGCG	ATCCTTTTCCTCCAGAGCGT	cloning/FISH
Smp_132670	Myosin regulatory light chain, putative	GAGACAGCGAGTAGTGGAGG	TGCCTTCTTTGATTGGAGCT	cloning/FISH
Smp_142120	Achaete scute transcription factor	CCGATCTCTGAAAGTCAACCAC	AGAGCTATCATAACCGGAGTCG	cloning/FISH
Smp_087310	Hypothetical protein (bhlh)	CACCGATTCAACGGAAACTT	GCGTACTGCCATTGGAATTT	cloning/FISH
smp_086860	Histone H2a	AGCTGCTGAAGTGCTTGAAC	TCGTTACGAATGGCAAGCTG	qPCR
