# Supplementary figures and images for: Self-assembling manifolds in single-cell RNA sequencing data
Source: eLife journal article supplement (doi:10.7554/elife.48994), 2019-09-16

**a**

SAM

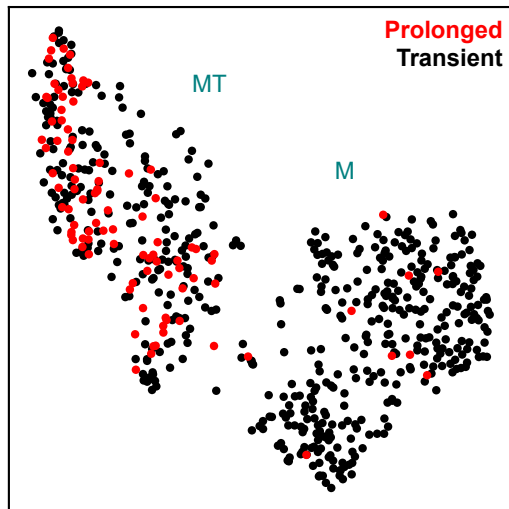**b**

Seurat

SIMLR

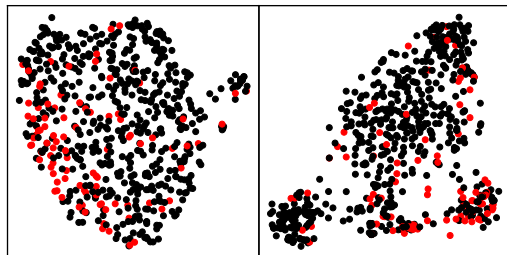**c**

Seurat

SIMLR

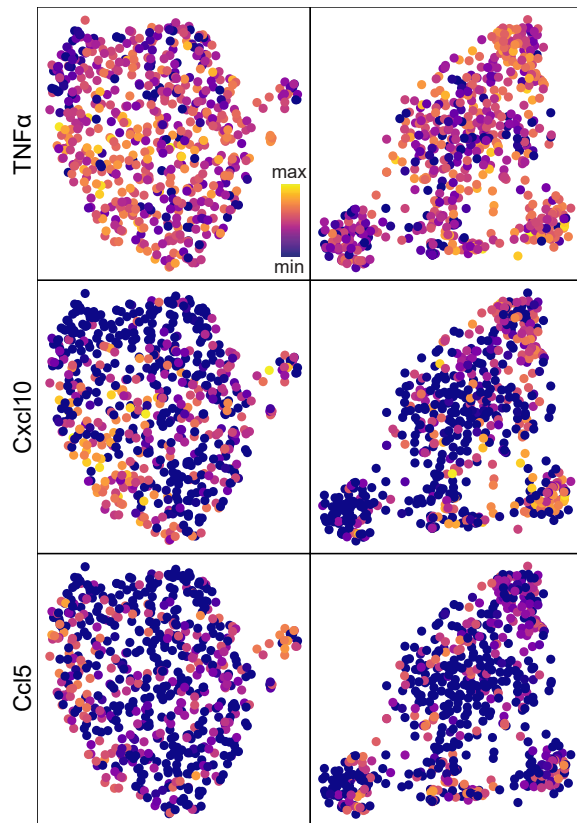

Supplement: supp [file elife-48994-supp-v1.zip]

**a**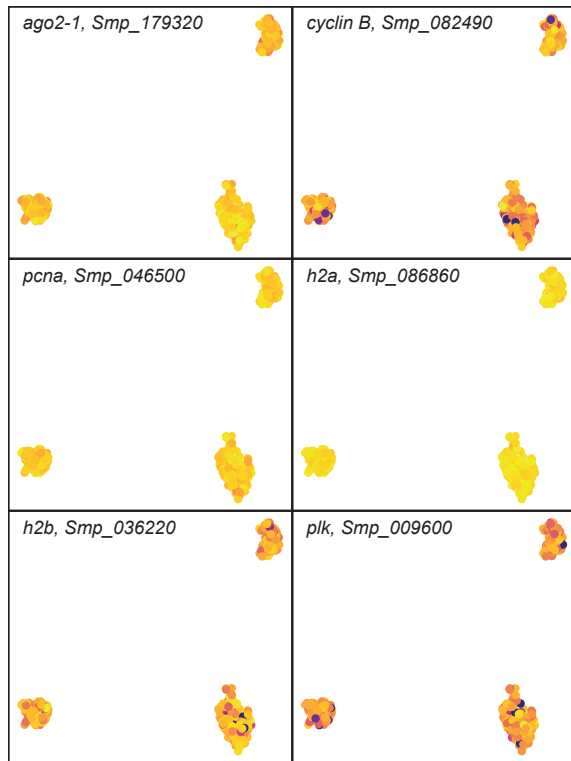**b**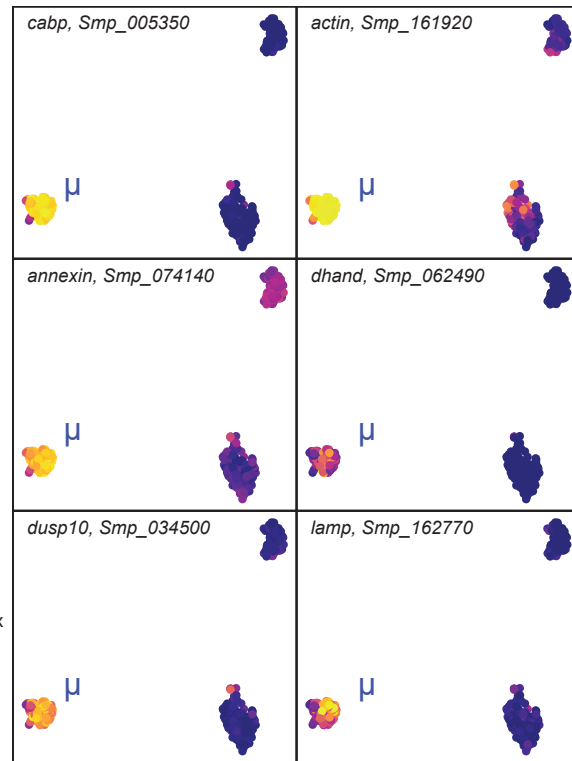

Supplement: supp [file elife-48994-supp-v1.zip]

**a**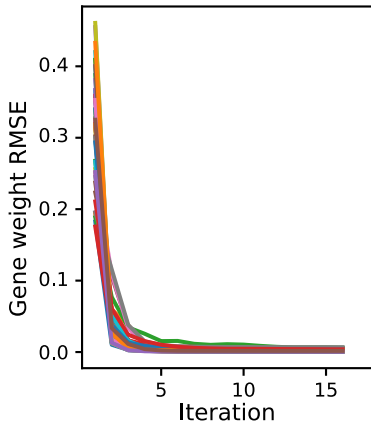**b**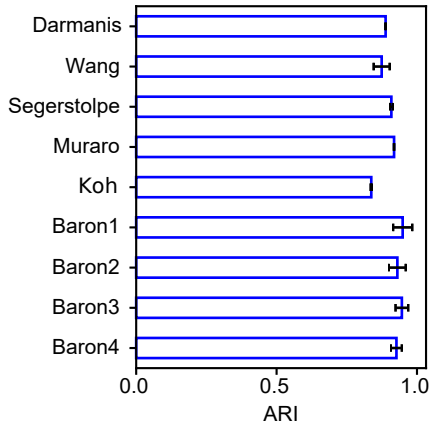**c**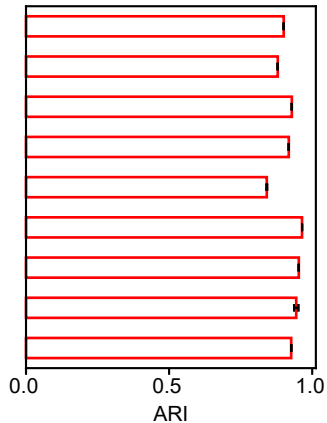

Supplement: supp [file elife-48994-supp-v1.zip]

**a**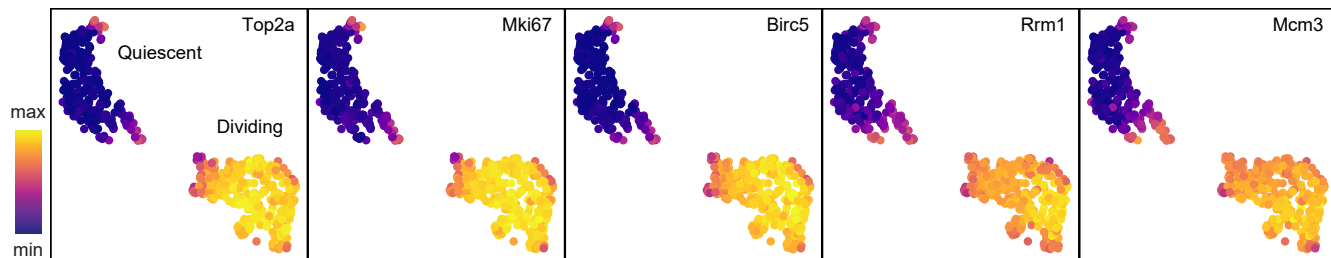**b**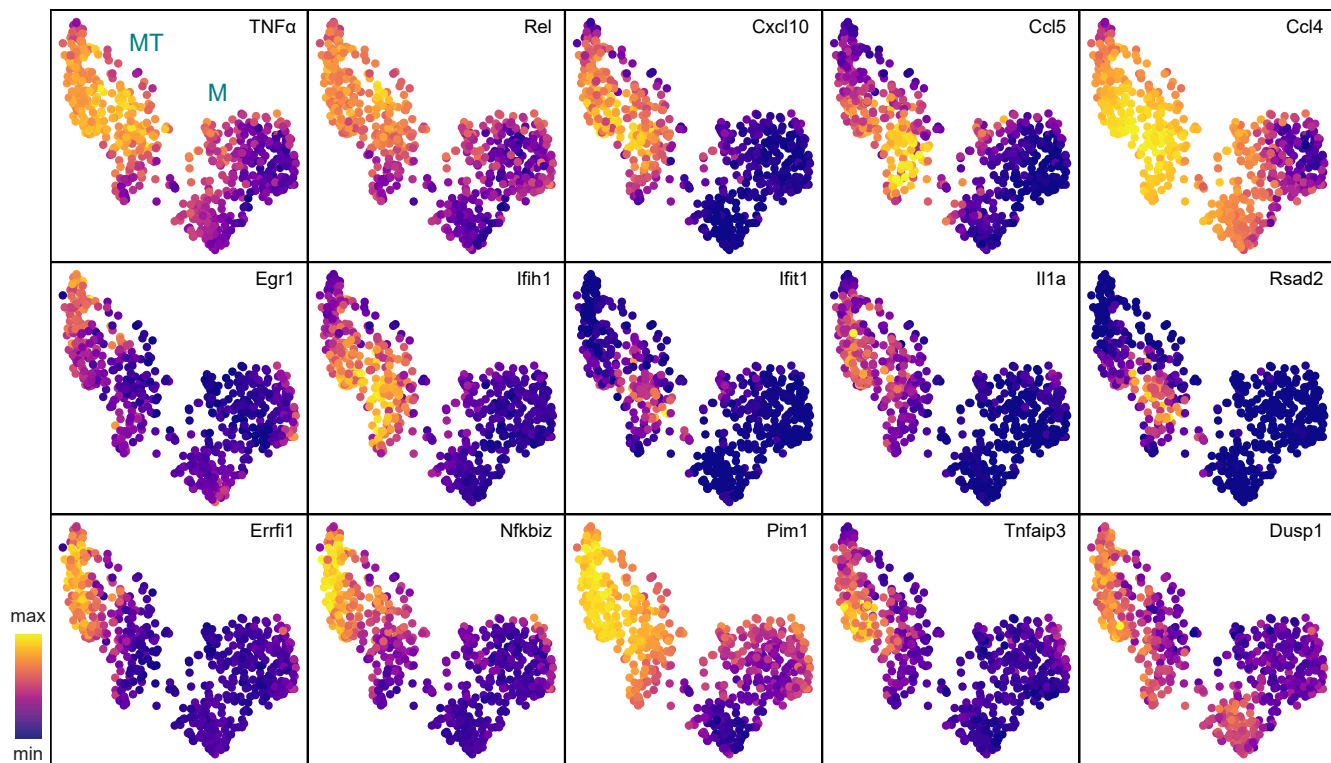

Supplement: supp [file elife-48994-supp-v1.zip]

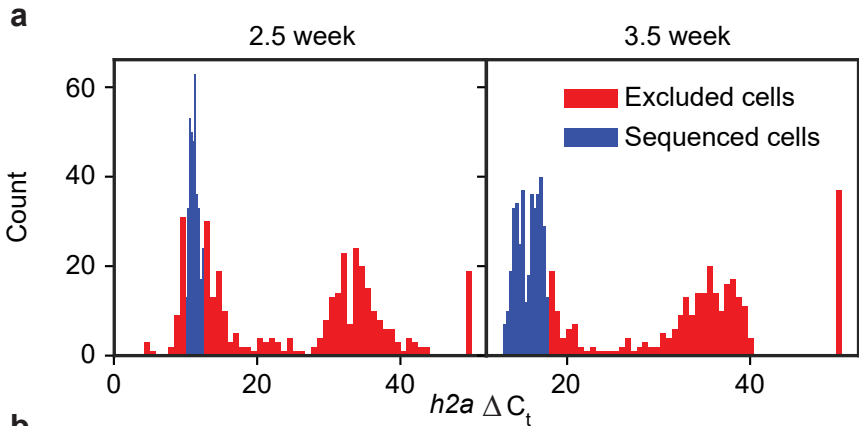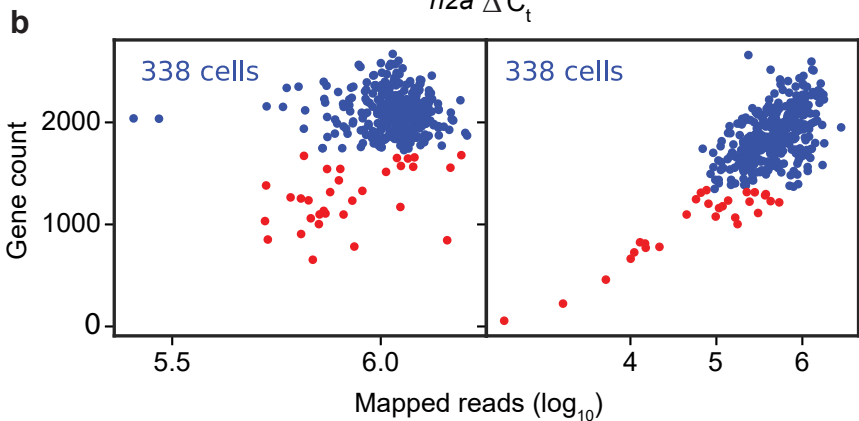

Supplement: supp [file elife-48994-supp-v1.zip]
